# Supplementary material for: Anticancer drug sensitivity prediction in cell lines from baseline gene expression through recursive feature selection
Source: PubMed Central journal article supplement (PMC4485860; doi:10.1186/s12885-015-1492-6), 2015-06-30

Results of cross-validation(EXP vs EXP+CPV+SNP)

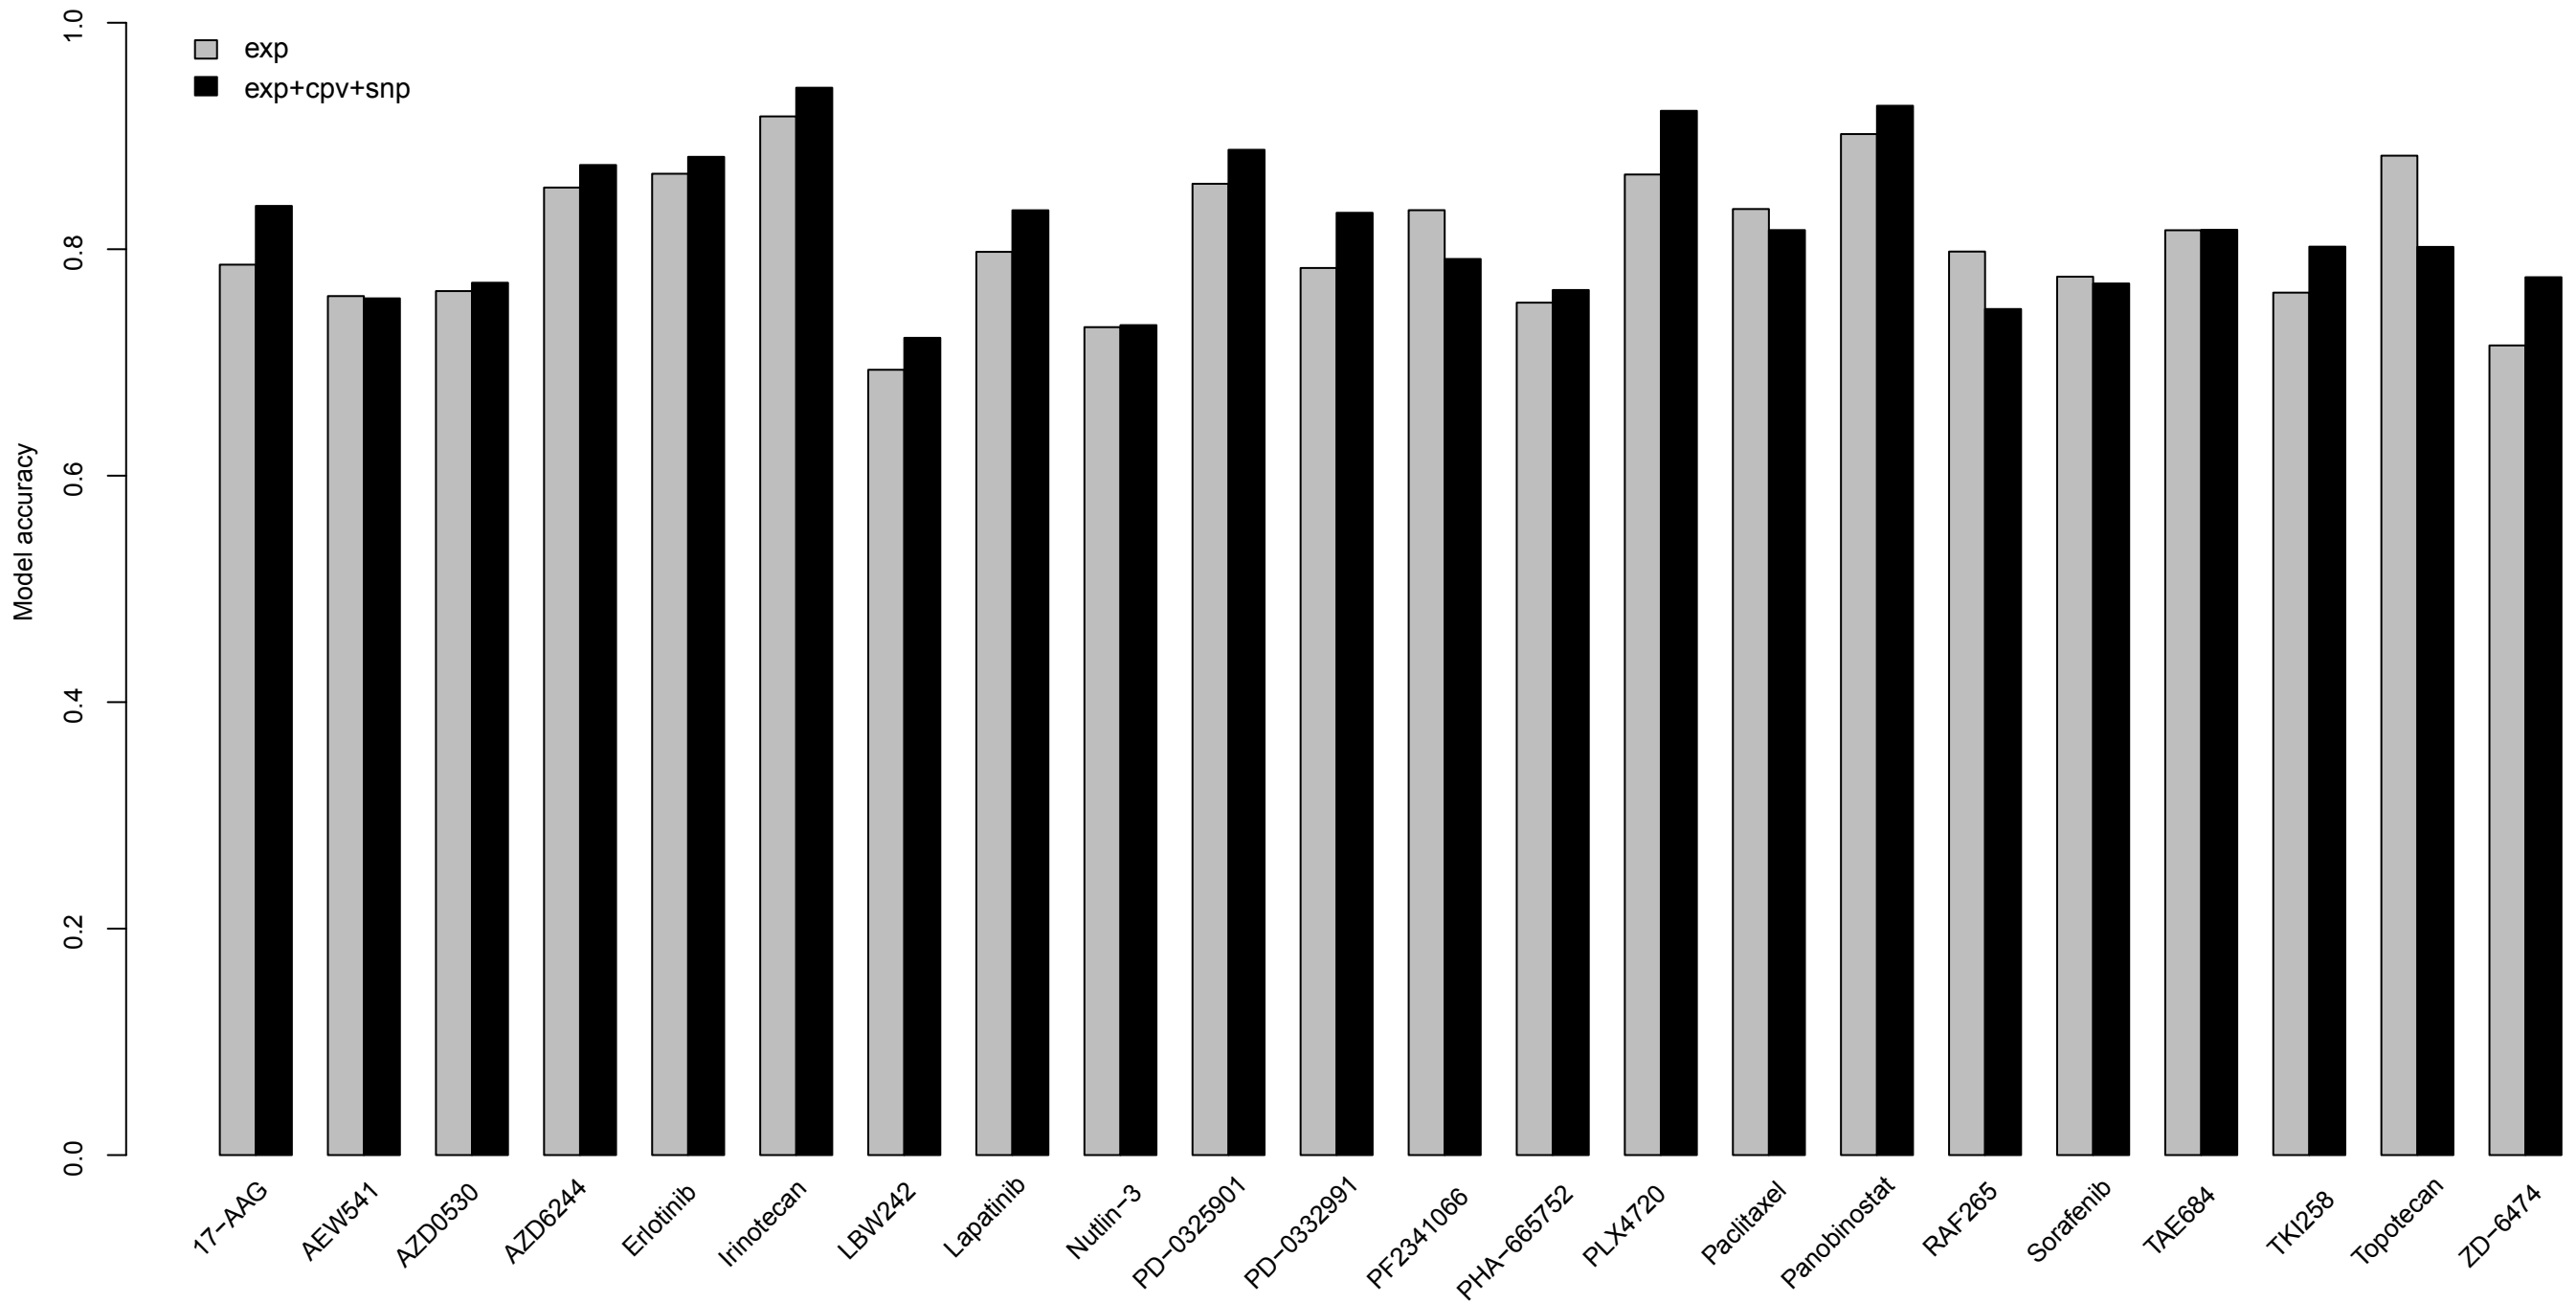

Supplement: 12885_2015_1492_MOESM14_ESM.pdf [file 12885_2015_1492_MOESM14_ESM.pdf]
