# Supplementary material for: Anticancer drug sensitivity prediction in cell lines from baseline gene expression through recursive feature selection
Source: Springer Nature journal article supplement (doi:10.1186/s12885-015-1492-6), 2015-06-29

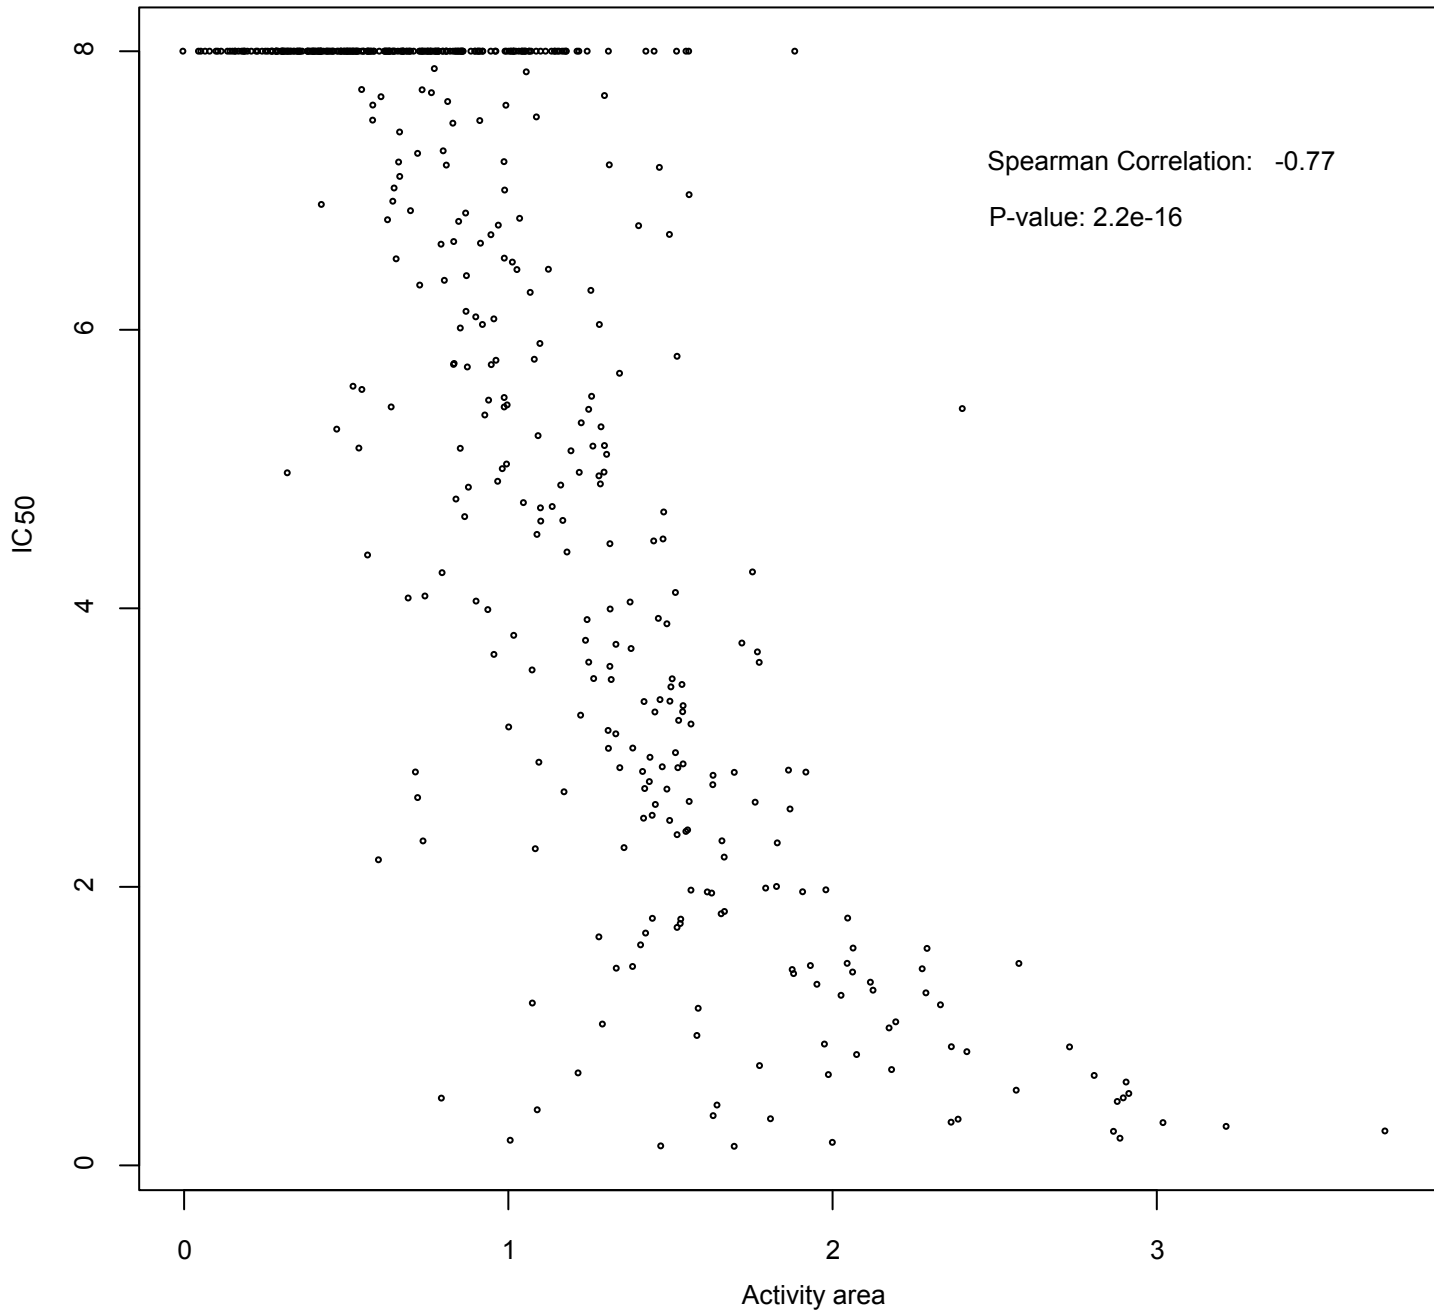

Supplement: MOESM1 [file 9744766]
